# Supplementary material for: Oligosaccharide Binding Proteins from Bifidobacterium longum subsp. infantis Reveal a Preference for Host Glycans
Source: PubMed Central journal article supplement (PMC3057974; doi:10.1371/journal.pone.0017315), 2011-03-15
Supplement: pone.0017315.s001.pdf [file pone.0017315.s001.pdf]

**A****Blon\_2015 cluster**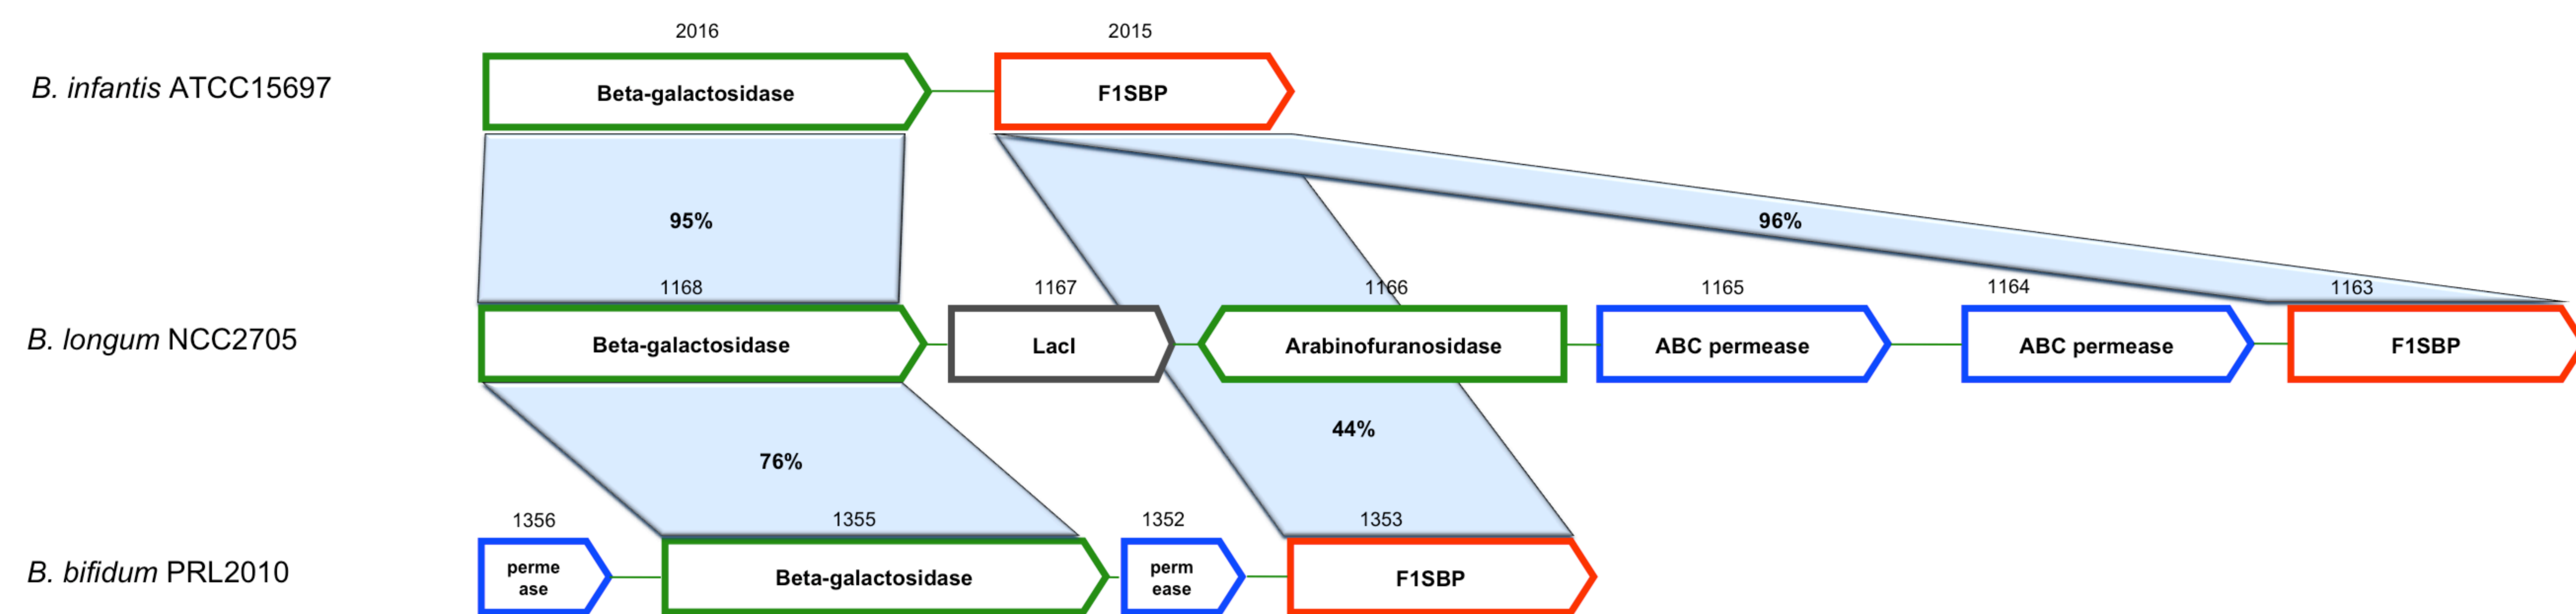**B****Blon\_2061 cluster**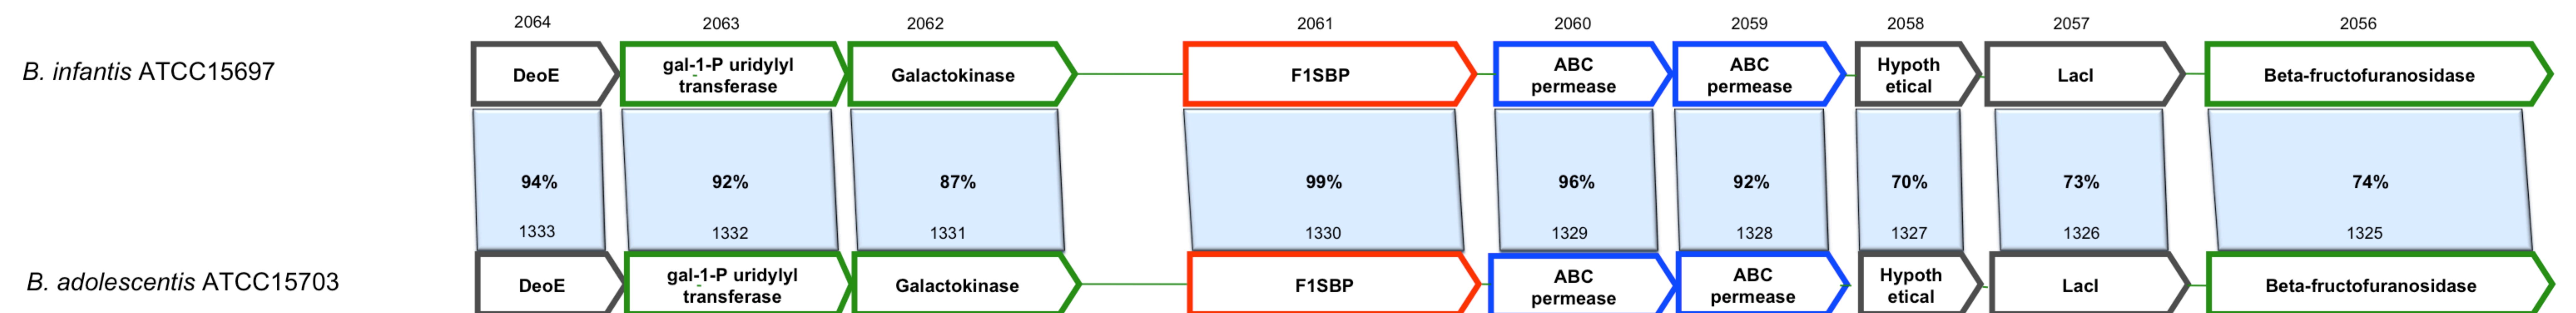**C****Blon\_2414 cluster**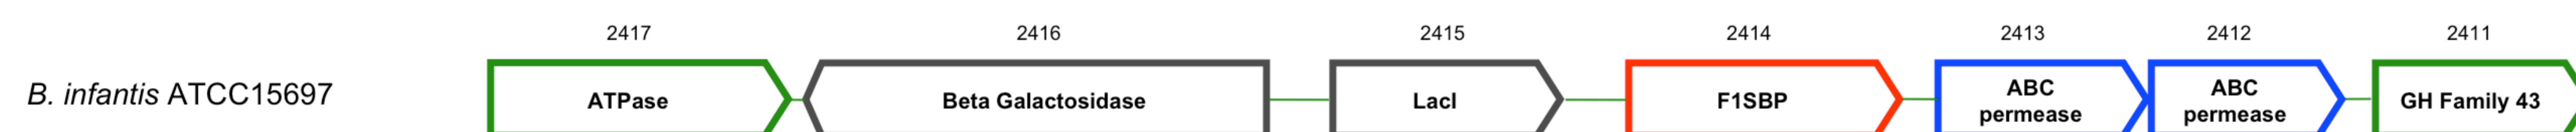**D****Blon\_2458 cluster**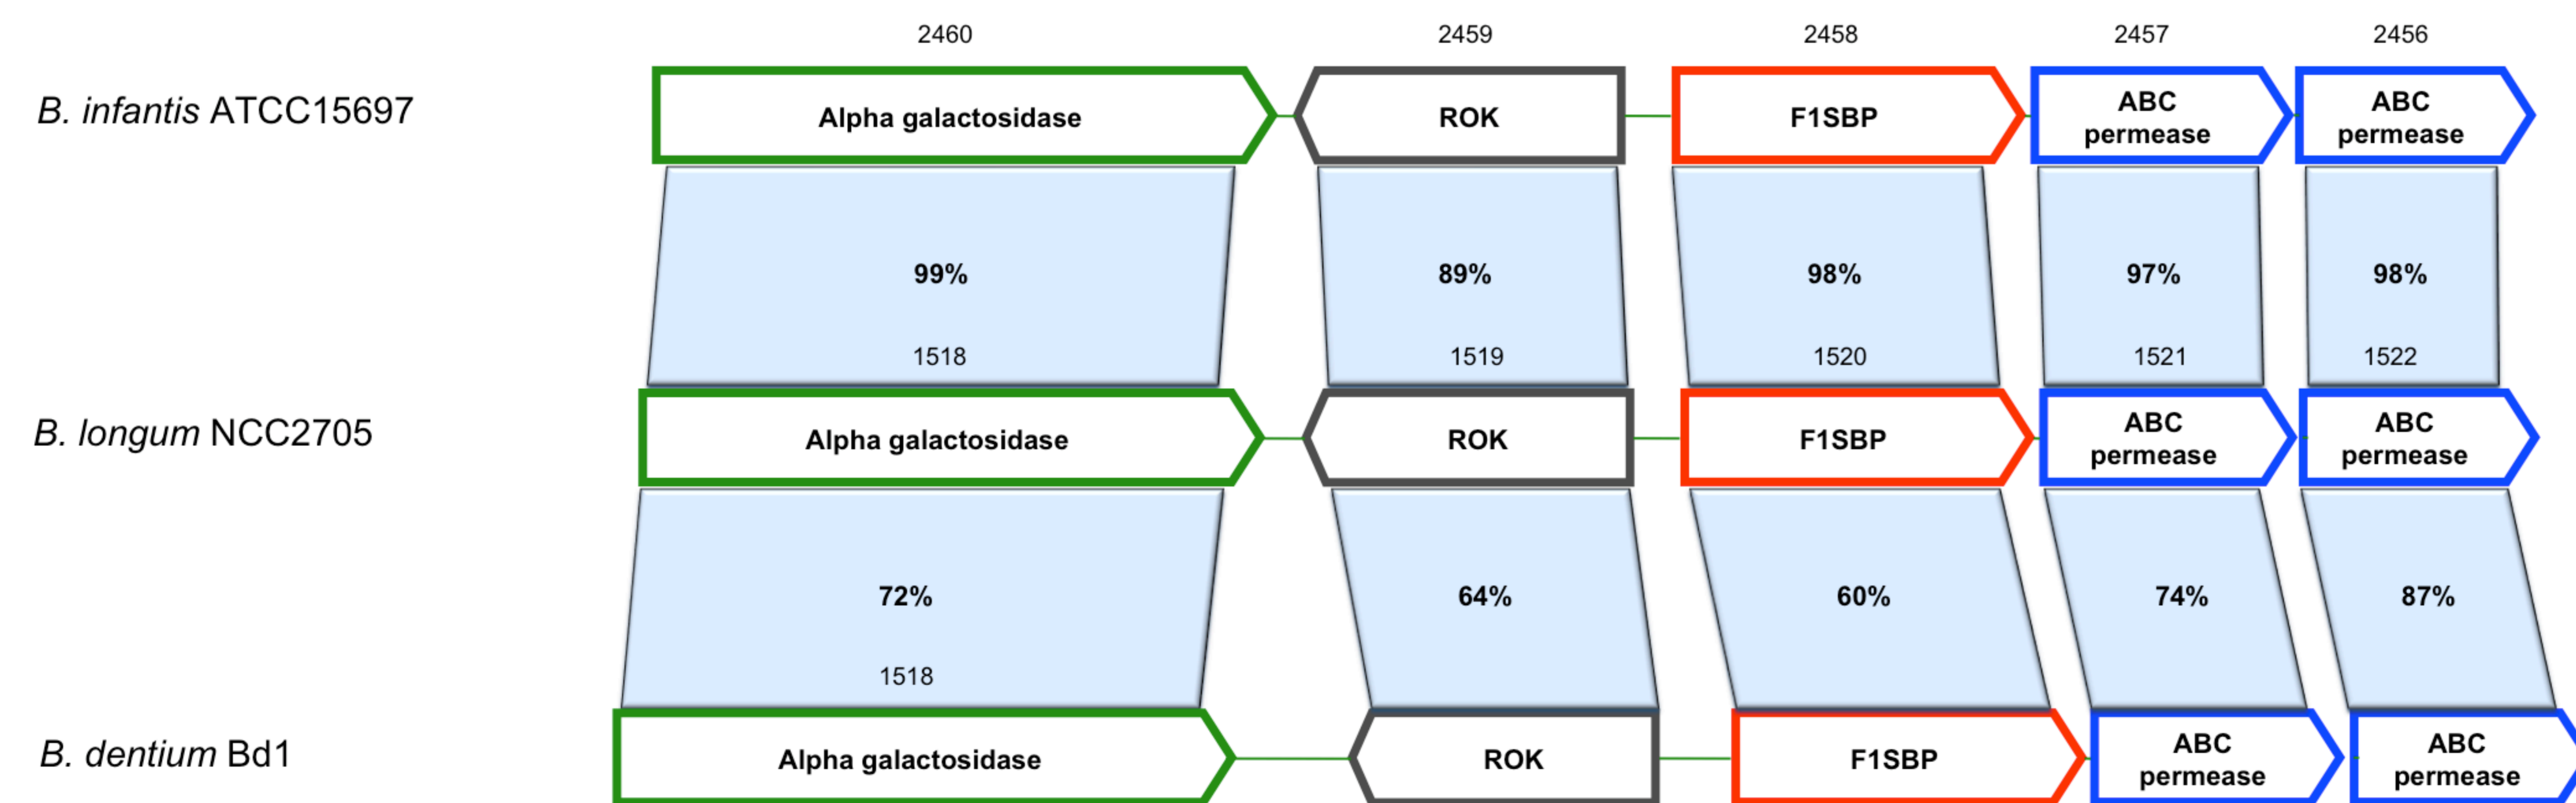

← 1 kb →
